# Supplementary material for: Balancing Damage via Non-Photochemical Quenching, Phenolic Compounds and Photorespiration in Ulva prolifera Induced by Low-Dose and Short-Term UV-B Radiation
Source: MDPI journal article supplement (doi:10.3390/ijms23052693), 2022-02-28
Supplement: s1 [file s1]

## Supplementary Materials

**Table S1.** Differential metabolic pathway under different treatments ( $p$  value < 0.05).

| Treatments<br>Number | 0.3-1~NL-1                                          | 1.6-1~NL-1                                          | 0.3-2~NL-2                               | 1.6-2~NL-2                                          |
|----------------------|-----------------------------------------------------|-----------------------------------------------------|------------------------------------------|-----------------------------------------------------|
|                      |                                                     |                                                     |                                          |                                                     |
| 1                    | Glycolysis / Gluconeogenesis                        | Biosynthesis of amino acids                         | ABC transporters                         | Biosynthesis of amino acids                         |
| 2                    | Biosynthesis of amino acids                         | Aminoacyl-tRNA biosynthesis                         | Aminoacyl-tRNA biosynthesis              | Aminoacyl-tRNA biosynthesis                         |
| 3                    | Pyrimidine metabolism                               | Arginine biosynthesis                               | Biosynthesis of amino acids              | ABC transporters                                    |
| 4                    | Galactose metabolism                                | ABC transporters                                    | Cyanoamino acid metabolism               | Glutathione metabolism                              |
| 5                    | Tyrosine metabolism                                 | Alanine, aspartate and glutamate metabolism         | Purine metabolism                        | Cyanoamino acid metabolism                          |
| 6                    | Arginine biosynthesis                               | Pyrimidine metabolism                               | Arginine biosynthesis                    | Galactose metabolism                                |
| 7                    | ABC transporters                                    | Cyanoamino acid metabolism                          | Galactose metabolism                     | Arginine biosynthesis                               |
| 8                    | 2-Oxocarboxylic acid metabolism                     | Galactose metabolism                                | Phenylalanine metabolism                 | Glyoxylate and dicarboxylate metabolism             |
| 9                    | Pyruvate metabolism                                 | Purine metabolism                                   | Glycine, serine and threonine metabolism | Carbon metabolism                                   |
| 10                   | Phenylalanine, tyrosine and tryptophan biosynthesis | Glycolysis / Gluconeogenesis                        | Tyrosine metabolism                      | Alanine, aspartate and glutamate metabolism         |
| 11                   | Starch and sucrose metabolism                       | beta-Alanine metabolism                             | Monobactam biosynthesis                  | Lysine degradation                                  |
| 12                   | Phenylalanine metabolism                            | 2-Oxocarboxylic acid metabolism                     | Pyrimidine metabolism                    | Lysine biosynthesis                                 |
| 13                   | Glutathione metabolism                              | Lysine degradation                                  | Fatty acid biosynthesis                  | Phenylalanine, tyrosine and tryptophan biosynthesis |
| 14                   | Cyanoamino acid metabolism                          | Phenylalanine, tyrosine and tryptophan biosynthesis | Arginine and proline metabolism          | Nitrogen metabolism                                 |
| 15                   | Nitrogen metabolism                                 | Glutathione metabolism                              | Sulfur metabolism                        | Pyrimidine metabolism                               |

---

|    |                                             |                                         |                                                        |                                                        |
|----|---------------------------------------------|-----------------------------------------|--------------------------------------------------------|--------------------------------------------------------|
| 16 | Aminoacyl-tRNA biosynthesis                 | Citrate cycle (TCA cycle)               | Glyoxylate and dicarboxylate metabolism                | Phenylalanine metabolism                               |
| 17 | Citrate cycle (TCA cycle)                   | Phenylalanine metabolism                | Phenylalanine, tyrosine and tryptophan biosynthesis    | Glycine, serine and threonine metabolism               |
| 18 | Pentose and glucuronate interconversions    | Pantothenate and CoA biosynthesis       | Phenylpropanoid biosynthesis                           | Arginine and proline metabolism                        |
| 19 | Phenylpropanoid biosynthesis                | Carbon metabolism                       | Glutathione metabolism                                 | Tryptophan metabolism                                  |
| 20 | Alanine, aspartate and glutamate metabolism | Glyoxylate and dicarboxylate metabolism | Tropane, piperidine and pyridine alkaloid biosynthesis | Fructose and mannose metabolism                        |
| 21 | Pantothenate and CoA biosynthesis           | Starch and sucrose metabolism           | Nitrogen metabolism                                    | Purine metabolism                                      |
| 22 |                                             | Phenylpropanoid biosynthesis            | Carbon metabolism                                      | Phenylpropanoid biosynthesis                           |
| 23 |                                             | Monobactam biosynthesis                 |                                                        | Monobactam biosynthesis                                |
| 24 |                                             | Butanoate metabolism                    |                                                        | Tropane, piperidine and pyridine alkaloid biosynthesis |
| 25 |                                             | Nitrogen metabolism                     |                                                        |                                                        |
| 26 |                                             | Arginine and proline metabolism         |                                                        |                                                        |

---
